# Supplementary material for: Automated detection of elephants in wildlife video
Source: Springer Nature journal article supplement (doi:10.1186/1687-5281-2013-46), 2013-08-12
Supplement: 13640_2013_87_MOESM7_ESM.pdf [file 13640_2013_87_MOESM7_ESM.pdf]

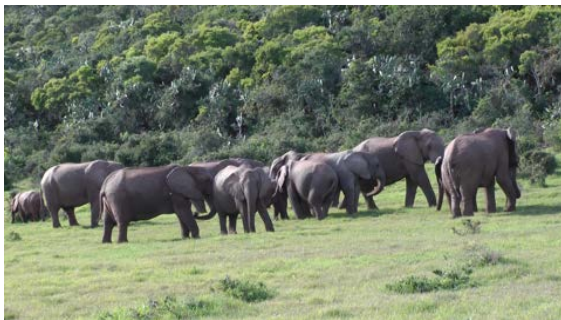

(a)

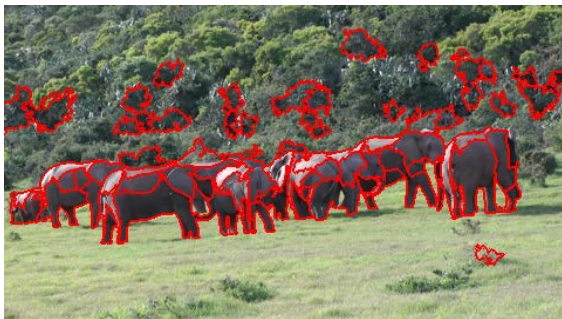

(b)

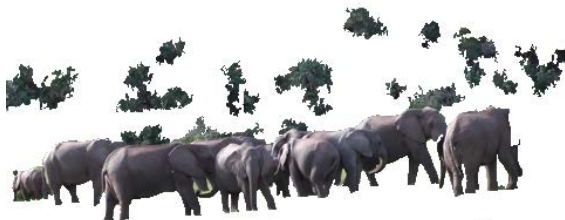

(c)

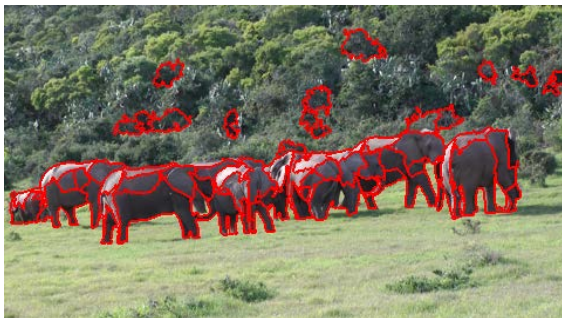

(d)

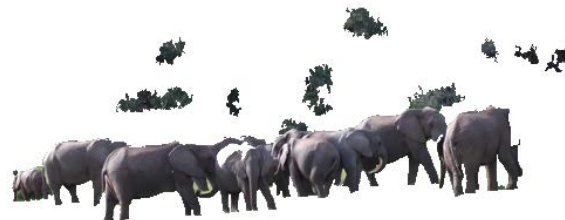

(e)
